# Supplementary material
Source: PubMed Central journal article supplement (PMC3811564)
Supplement: EC.00068-13_zek999094148so1.pdf [file EC.00068-13_zek999094148so1.pdf]

1 **Supplemental Figure 1. CMF22 and basal body co-staining.** Indirect immunofluorescence  
2 on detergent-extracted cytoskeletons from CMF22-HA cells. Samples were stained with anti-  
3 HA antibodies to detect CMF22-HA (green) and YL 1/2 antibodies as a marker for the basal  
4 body (red). The kDNA and nuclear DNA were stained with DAPI (blue).

5 **Supplemental Figure 2. CMF22 knockdown does not affect axoneme ultrastructure.**

6 Transmission electron microscopy (TEM) analysis of flagella in CMF22-UKD cells grown in the  
7 absence or presence of tetracycline for 72 hours as indicated. Samples are either whole cells  
8 (upper panels) or 1% NP40-extracted samples (lower panels).

9 **Supplemental Figure 3. Removal of tetracycline restores wild-type motility in CMF22-**

10 **UKD cells.** CMF22-UKD cells were induced with tetracycline for RNAi knockdown of CMF22  
11 for 72 hours then tetracycline was removed by diluting the culture to  $1 \times 10^6$  every 24 hours for 5  
12 days. (A) Motility traces of individual cells at day 5 after tetracycline removal. (B) Mean  
13 squared displacement (msd) of CMF22-UKD cells after 5 days tetracycline removal is plotted as  
14 a function of time interval.

15 **Supplemental Figure 4. CMF22 Knockdown cells exhibits both reverse and forward beats.**

16 Time-lapse image series from video microscopy of CMF22-UKD cells 72 hrs post induction.

17 Filled arrow indicates position of wave at each time point. Unfilled arrows indicate approximate  
18 position where waveform originated. “P” marks the posterior end of the cell and “A” marks the

19 anterior end of the cell. (Top) Induction with Tet shows a reverse flagellar beat that moves  
20 toward the base of the flagellum. Frames 110 to 130 taken from Supplementary Movie 5.

21 (Bottom) A reverse flagellar beat that moves towards the base of the flagellum, then stops and

22 moves toward the tip of the flagellum (bottom panels). Frames 145 to 595 taken from  
23 Supplemental Movie #8.

24 **Supplemental Table #1: CMF22 orthologues from 115 diverse eukaryotes.** The TbCMF22  
25 protein (XP\_828418.1) was used as the original query to perform reciprocal best BLAST using  
26 the NCBI BLAST portal and species specific portals. An orthologue was confirmed only if  
27 TbCMF22 was returned as the top hit upon BLAST against the *T. brucei* genome. To get diverse  
28 coverage of genomes, multiples species from the same genus were not compared. Our study  
29 found 85 orthologues for CMF22 out of 86 organisms with motile cilia, 0 out of 4 organisms  
30 with immotile cilia and 3 out of 25 organisms without cilia.

31 **Supplemental Movie #1: 30 fps CMF22-UKD –Tet, control cells.** Video microscopy shows  
32 normal motility of uninduced (-Tet) CMF22-UKD cell line. Notice that the cell rapidly travels  
33 across the field of view. Video recorded and played at 30 fps.

34 **Supplemental Movie #2: 30 fps CMF22-UKD +Tet cells.** After 72 hours of RNAi induction  
35 (+Tet), CMF22-UKD cells exhibit erratic movements in which flagellar beating is impaired and  
36 cells are not capable of propulsive motility. Notice in the knockdown (+Tet), erratic movements  
37 of the flagellar tip, bent anterior (thin end), and base-to-tip beating. Video recorded and played at  
38 30 fps.

39 **Supplemental Movie #3: 1000fps video of flagellar beating in control cells.** Cells maintained  
40 –Tet. Videos were recorded at 1000 frames/second and played back at 50 frames/second. Note  
41 several tip-to-base beats. Figure 6 (-Tet) shows time-lapse image series taken from frames 100 to  
42 300.

43 **Supplemental Movie #4: 1000fps video of reverse (base-to-tip) flagellar beating in CMF22**  
44 **Knockdown cells.** CMF22-UKD cells were maintained +Tet for 72 hrs. Videos recorded at  
45 1000fps and played at 50 fps. Figure 6 (+Tet) shows time-lapse image series taken from frames  
46 150 to 350.

47 **Supplemental Movie #5. 1000fps video of forward (tip-to-base) flagellar beating in CMF22**  
48 **knockdown cells.** CMF22-UKD cells were maintained +Tet for 72 hrs. Videos recorded at  
49 1000fps and played at 50 fps. Video shows a flagellar beat that moves from tip toward base but  
50 then appears to stop and then reverse direction. Supplemental Figure 3 (top panels) shows time-  
51 lapse image series taken from frames 110 to 130.

52 **Supplemental Movie #6: 30 fps video of normal cell translocation in CMF22UKD-Ri cells**  
53 **maintained in –Tet.** Video shows essentially normal beating and translocation of CMF22-UKD-  
54 Ri cells before RNAi induction with Tet.

55 **Supplemental Movie #7: 30 fps video of normal cell translocation in CMF22UKD-Ri cells**  
56 **72 hours post-induction for RNAi against endogenous CMF22.** CMF22UKD-Ri cells were  
57 maintained +Tet for 72 hrs. Video was recorded and played at 30 fps. Video shows essentially  
58 normal beating and translocation of CMF22-UKD-Ri cells after RNAi knockdown of  
59 endogenous CMF22.

60 **Supplemental Movie #8: 1000 fps video of reverse flagellar beating followed by a forward**  
61 **beat in CMF22 Knockdown cells.** CMF22-UKD cells were maintained +Tet for 72 hrs. Videos  
62 recorded at 1000fps and played at 50 fps. Video shows a forward beat that moves from the tip  
63 towards the base of the flagellum (frames 100 to 200) and is immediately followed by a reverse

64 beat that moves back to the tip of the flagellum (frames 300 to 400). Supplemental Figure 3  
65 (bottom) shows time-lapse image series taken from frames 145 to 595.

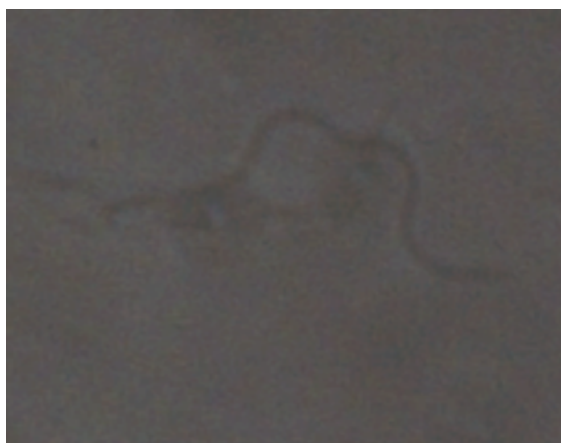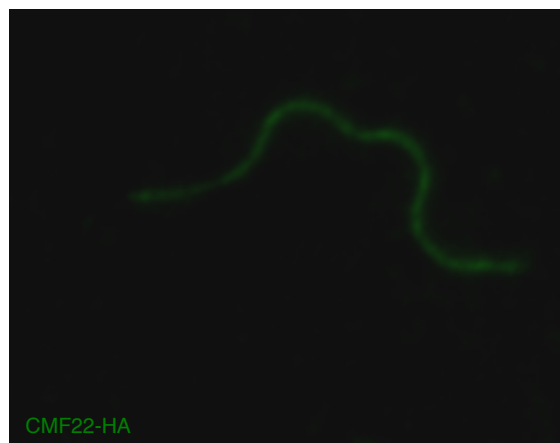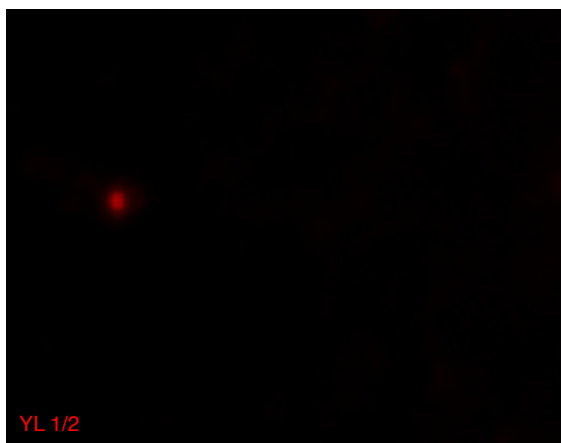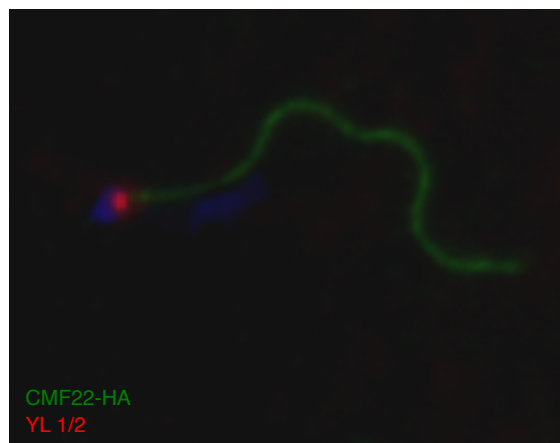

-Tet

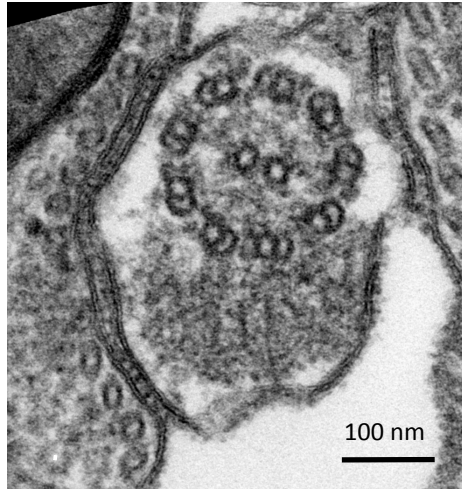

+ Tet

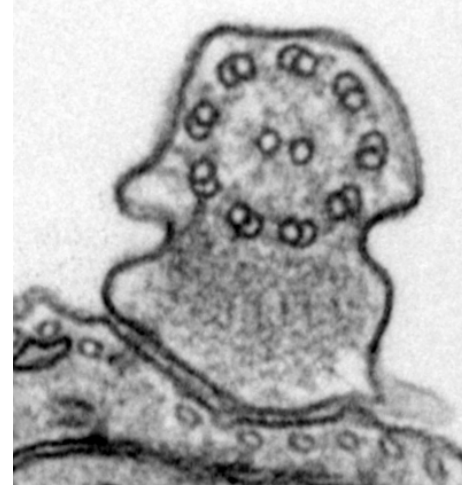

Whole Cells

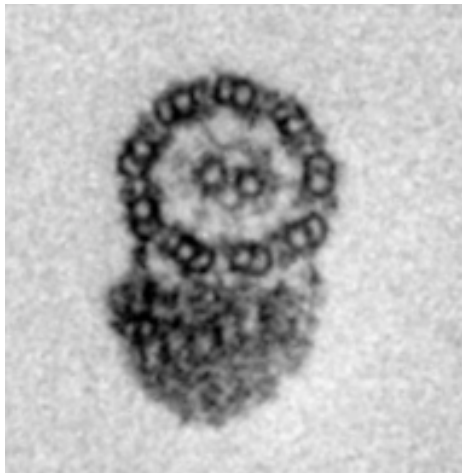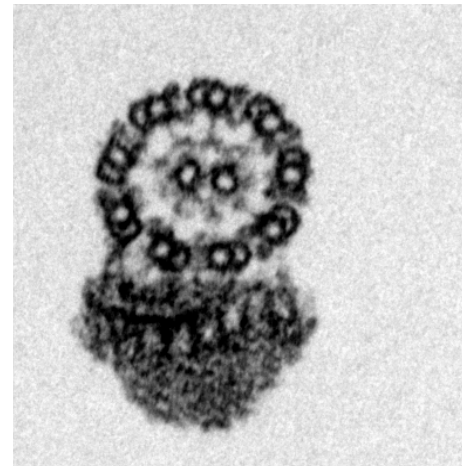

Cytoskeletons

A

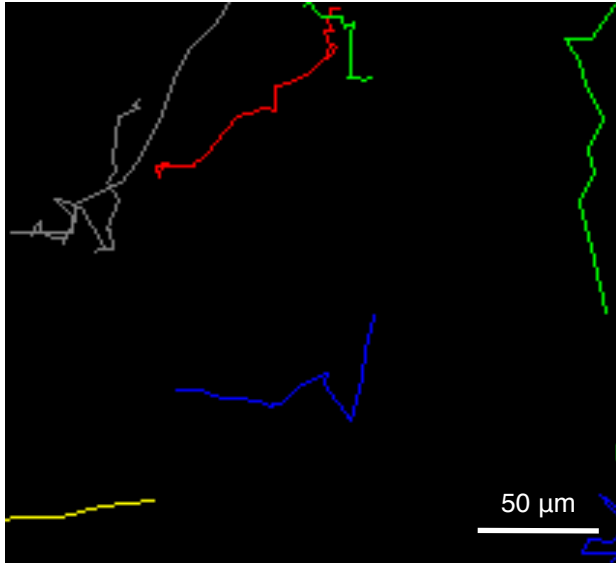

B

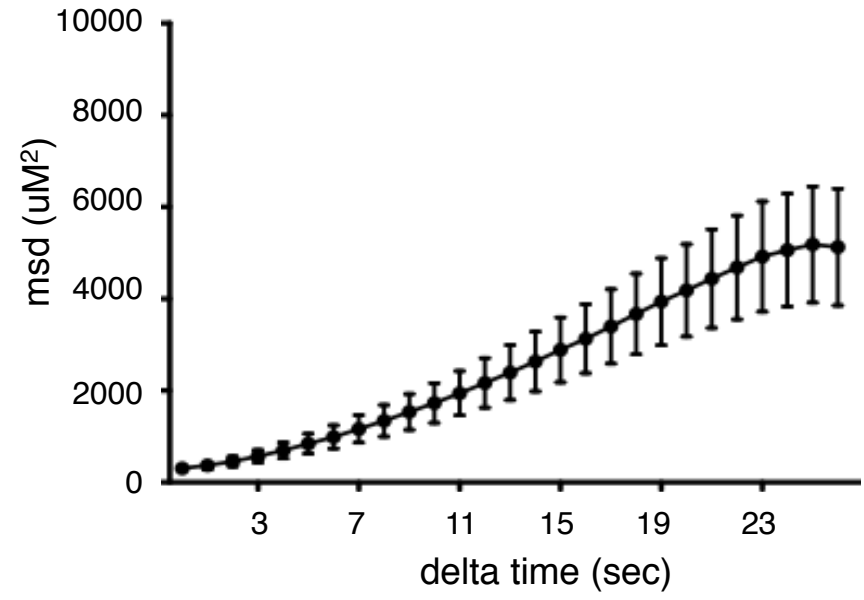

CMF22-UKD +Tet

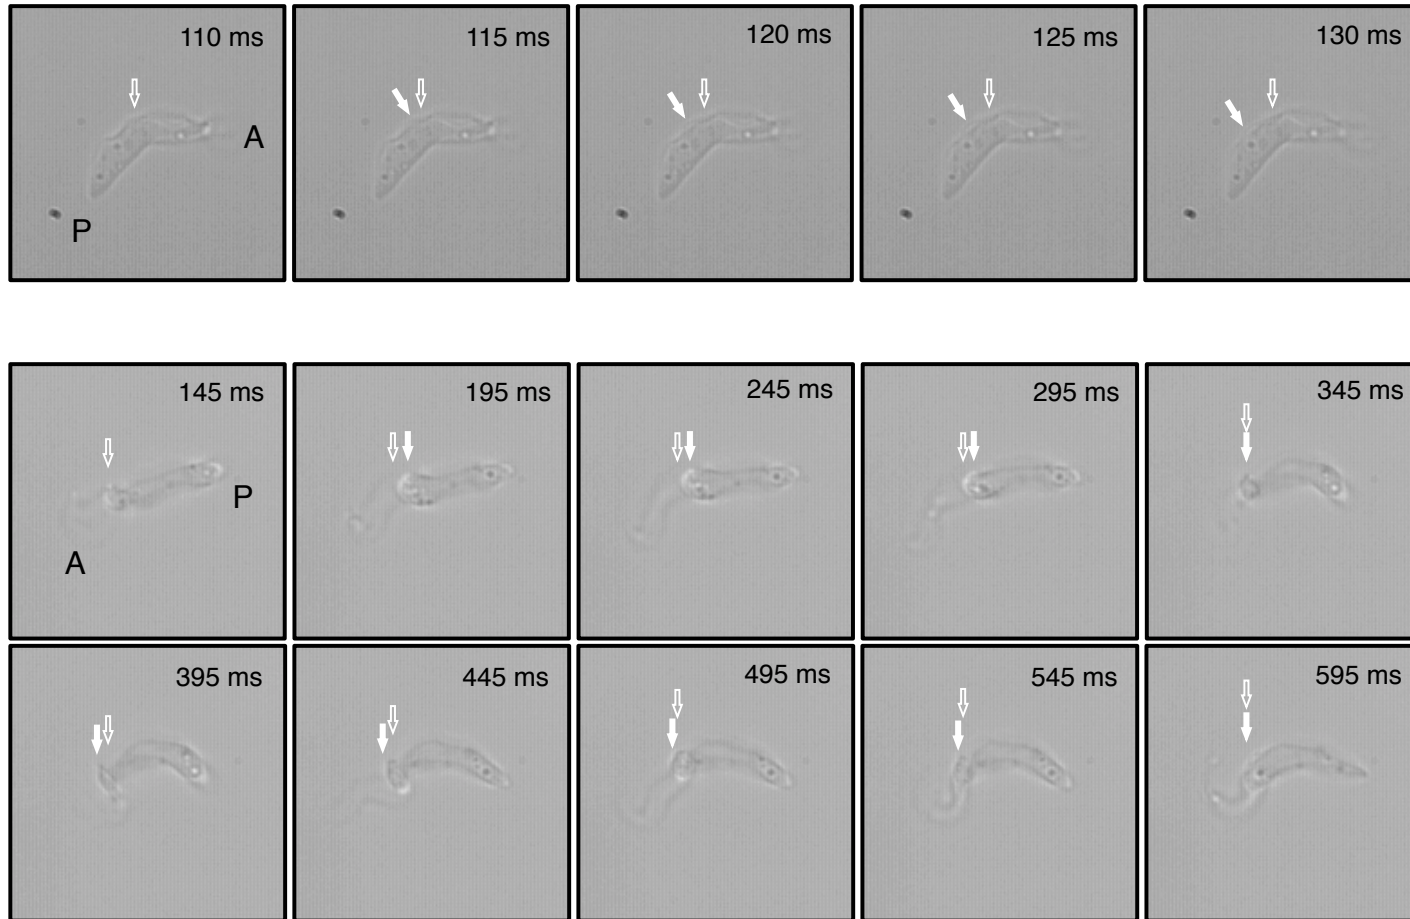



| Motile Cilia                          | CMF22 Orthologue                      |
|---------------------------------------|---------------------------------------|
| <i>Acyrtosiphon pisum</i>             | XP_003242250.1                        |
| <i>Aedes aegypti</i>                  | XP_001658040.1                        |
| <i>Ailuropoda melanoleuca</i>         | XP_002915532.1                        |
| <i>Allomyces macrogynus</i>           | AMAG_01639.2                          |
| <i>Amphimedon queenslandica</i>       | XP_003388958.1                        |
| <i>Anolis carolinensis</i>            | XP_003215233.1                        |
| <i>Anopheles gambiae</i>              | XP_320769.4                           |
| <i>Apis mellifera</i>                 | XP_001122486.2                        |
| <i>Batrachochytrium dendrobatidis</i> | EGF82441.1                            |
| <i>Bigeloviella natans</i>            | jgilBigna11142761                     |
| <i>Bos taurus</i>                     | NP_001193476.1                        |
| <i>Branchiostoma floridae</i>         | XP_002594378.1                        |
| <i>Canis familiaris</i>               | XP_539921.3                           |
| <i>Capitella teleta</i>               | ELU03195.1                            |
| <i>Chlamydomonas reinhardtii</i>      | XP_001690665.1                        |
| <i>Ciona intestinalis</i>             | XP_002129665.1                        |
| <i>Clonorchis sinensis</i>            | GAA52427.1                            |
| <i>Crassostrea gigas</i>              | EKC42060.1                            |
| <i>Culex pipiens</i>                  | XP_001847569.1                        |
| <i>Cyanophora paradoxa</i>            | ConsensusfromContig6672-snap-gene-0.0 |
| <i>Danaus plexippus</i>               | EHJ76815.1                            |
| <i>Danio rerio</i>                    | NP_001073437.2                        |
| <i>Drosophila melanogaster</i>        | AAM11255.1                            |
| <i>Ectocarpus siliculosus</i>         | CBN77721.1                            |
| <i>Emiliana huxleyi</i>               | jgilEmihu11235066                     |
| <i>Equus caballus</i>                 | XP_001496552.2                        |
| <i>Felis catus</i>                    | XP_003991344.1                        |
| <i>Gallus gallus</i>                  | XP_421878.2                           |
| <i>Giardia lamblia</i>                | XP_001707075.1                        |
| <i>Guillardia theta</i>               | EKX39704.1                            |
| <i>Harpegnathos saltator</i>          | EFN82410.1                            |
| <i>Helobdella robusta</i>             | jgilHelro11188756                     |
| <i>Heterocephalus glaber</i>          | EHB01958.1                            |
| <i>Homo sapiens</i>                   | NP_001257513.1                        |
| <i>Hydra magnipapillata</i>           | XP_002168984.2                        |
| <i>Leishmania major</i>               | XP_001681896.1                        |
| <i>Lottia gigantea</i>                | jgilLotgi116152310860                 |
| <i>Loxodonta africana</i>             | XP_003417985.1                        |
| <i>Macaca mulatta</i>                 | EHH17871.1                            |
| <i>Meleagris gallopavo</i>            | XP_003207414.1                        |
| <i>Micromonas pusilla</i>             | XP_003061855.1                        |

| Motile Cilia                         | CMF22 Orthologue |
|--------------------------------------|------------------|
| <i>Monodelphis domestica</i>         | XP_001372750.2   |
| <i>Monosiga brevicollis</i>          | XP_001744417.1   |
| <i>Mus musculus</i>                  | NP_083398.2      |
| <i>Myotis davidii</i>                | ELK32629.1       |
| <i>Naegleria gruberi</i>             | XP_002678621.1   |
| <i>Nasonia vitripennis</i>           | XP_003423849.1   |
| <i>Nematostella vectensis</i>        | XP_001637403.1   |
| <i>Oikopleura dioica</i>             | CBY14496.1       |
| <i>Oreochromis niloticus</i>         | XP_003440019.1   |
| <i>Ornithorhynchus anatinus</i>      | XP_001513364.2   |
| <i>Oryctolagus cuniculus</i>         | XP_002723285.1   |
| <i>Oryzias latipes</i>               | XP_004067899.1   |
| <i>Ovis aries</i>                    | XP_004001818.1   |
| <i>Oxytricha trifallax</i>           | EJY71359.1       |
| <i>Pan troglodytes</i>               | XP_003309586.1   |
| <i>Paramecium tetraurelia</i>        | XP_001429179.1   |
| <i>Pediculus humanus</i>             | XP_002432035.1   |
| <i>Perkinsus marinus</i>             | XP_002776859.1   |
| <i>Physcomitrella patens</i>         | XP_001767278.1   |
| <i>Phytophthora infestans</i>        | XP_002898734.1   |
| <i>Plasmodium falciparum</i>         | None             |
| <i>Pongo abelii</i>                  | XP_002818732.2   |
| <i>Rattus norvegicus</i>             | NP_001019488.2   |
| <i>Saccoglossus kowalevskii</i>      | NP_001171756.1   |
| <i>Saprolegnia parasitica</i>        | SPRG_02274.1     |
| <i>Sarcophilus harrisii</i>          | XP_003770307.1   |
| <i>Schistosoma mansoni</i>           | XP_002572778.1   |
| <i>Selaginella moellendorffii</i>    | XP_002974085.1   |
| <i>Spizellomyces punctatus</i>       | SPPG_02701.3     |
| <i>Strongylocentrotus purpuratus</i> | XP_780770.3      |
| <i>Sus scrofa</i>                    | XP_003133808.1   |
| <i>Taeniopygia guttata</i>           | XP_004175065.1   |
| <i>Takifugu rubripes</i>             | XP_003974316.1   |
| <i>Tetrahymena thermophila</i>       | XP_001015966.1   |
| <i>Tetraodon nigroviridis</i>        | CAG08045.1       |
| <i>Thalassiosira pseudonana</i>      | XP_002294237.1   |
| <i>Thecamonas trahens</i>            | AMSG_00296.2     |
| <i>Toxoplasma gondii</i>             | XP_002371250.1   |
| <i>Tribolium castaneum</i>           | EFA11364.1       |
| <i>Trichomonas vaginalis</i>         | XP_001330039.1   |
| <i>Trichoplax adhaerens</i>          | XP_002111442.1   |
| <i>Trypanosoma brucei</i>            | XP_828418.1      |
| <i>Trypanosoma cruzi</i>             | XP_817318.1      |
| <i>Volvox carteri</i>                | XP_002951335.1   |
| <i>Xenopus tropicalis</i>            | XP_002932048.1   |

| Immotile Cilia                     | CMF22 Orthologue |
|------------------------------------|------------------|
| <i>Trichinella spiralis</i>        | None             |
| <i>Caenorhabditis elegans</i>      | None             |
| <i>Brugia malayi</i>               | None             |
| <i>Ascaris suum</i>                | None             |
|                                    |                  |
| No Cilia                           | CMF22 Orthologue |
| <i>Arabidopsis thaliana</i>        | None             |
| <i>Aureococcus anophagefferens</i> | EGB03618.1       |
| <i>Chlorella variabilis</i>        | EFN52029.1       |
| <i>Coprinopsis cinerea</i>         | None             |
| <i>Cryptococcus neoformans</i>     | None             |
| <i>Cryptosporidium parvum</i>      | None             |
| <i>Cyanidioschyzon merolae</i>     | None             |
| <i>Dictyostelium discoideum</i>    | None             |
| <i>Encephalitozoon cuniculi</i>    | None             |
| <i>Entamoeba histolytica</i>       | None             |
| <i>Glycine max</i>                 | None             |
| <i>Neurospora crassa</i>           | None             |
| <i>Oryza sativa</i>                | None             |
| <i>Ostreococcus tauri</i>          | XP_003078557.1   |
| <i>Phaeodactylum tricorutum</i>    | None             |
| <i>Populus trichocarpa</i>         | None             |
| <i>Rhizopus oryzae</i>             | None             |
| <i>Saccharomyces cerevisiae</i>    | None             |
| <i>Schizosaccharomyces pombe</i>   | None             |
| <i>Solanum tuberosum</i>           | None             |
| <i>Theileria annulata</i>          | None             |
| <i>Ustilago maydis</i>             | None             |
| <i>Vitis vinifera</i>              | None             |
| <i>Zea mays</i>                    | None             |
